# Supplementary material for: Ferroelectric polarization-enhanced charge separation in a vanadium-doped ZnO photoelectrochemical system
Source: Royal Society of Chemistry journal article supplement (doi:10.1039/c8qi00231b), 2018-01-01
Supplement: c8qi00231b1.pdf [file c8qi00231b1.pdf]

# Ferroelectric Polarization-Enhanced Charge Separation in Vanadium-doped ZnO Photoelectrochemical System

Yichong Liu,<sup>‡a</sup> Zhuo Kang,<sup>‡\*a</sup> Suicai Zhang,<sup>a</sup> Yong Li,<sup>a</sup> Hualin Wu,<sup>a</sup> Jing Wu,<sup>a</sup> Pingwei Wu,<sup>a</sup>  
Zheng Zhang,<sup>a</sup> Qingliang Liao<sup>a</sup> and Yue Zhang<sup>\*ab</sup>

<sup>a</sup> State Key Laboratory for Advanced Metals and Materials, School of Materials Science and Engineering, University of Science and Technology Beijing, Beijing 100083, China.

<sup>b</sup> The Beijing Municipal Key Laboratory of New Energy Materials and Technologies, University of Science and Technology Beijing, Beijing 100083, China.

E-mail: zhuokang@ustb.edu.cn (K. Kang), yuezhong@ustb.edu.cn (Y. Zhang).

<sup>‡</sup>Y. Liu and Z. Kang contributed equally to this work

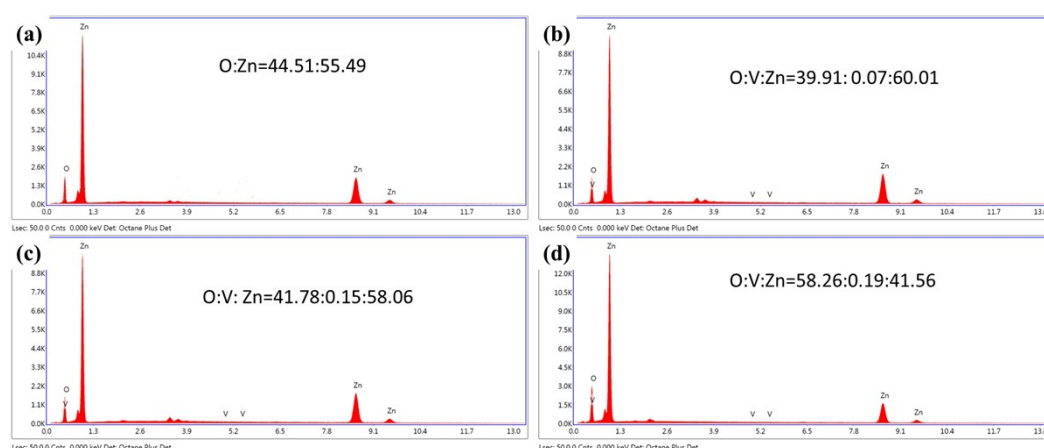

**Figure S1** EDS spectrum of pure ZnO, ZnO/V-1, ZnO/V-2 and ZnO/V-4.

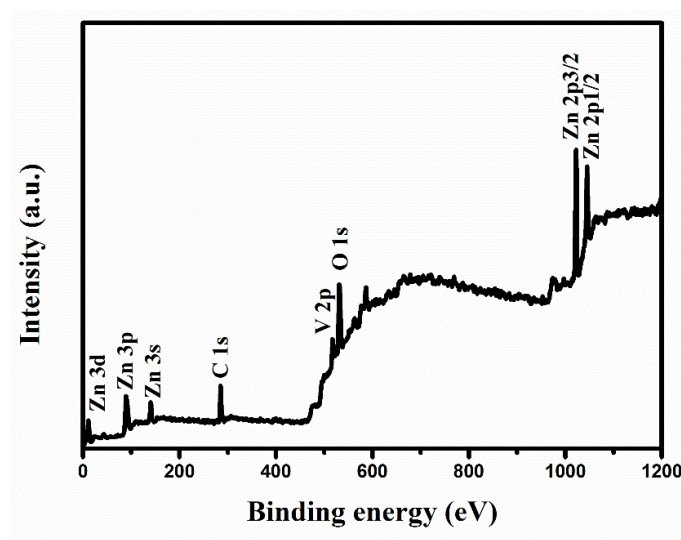

**Figure S2** XPS spectra of ZnO/V-2 NRAs.

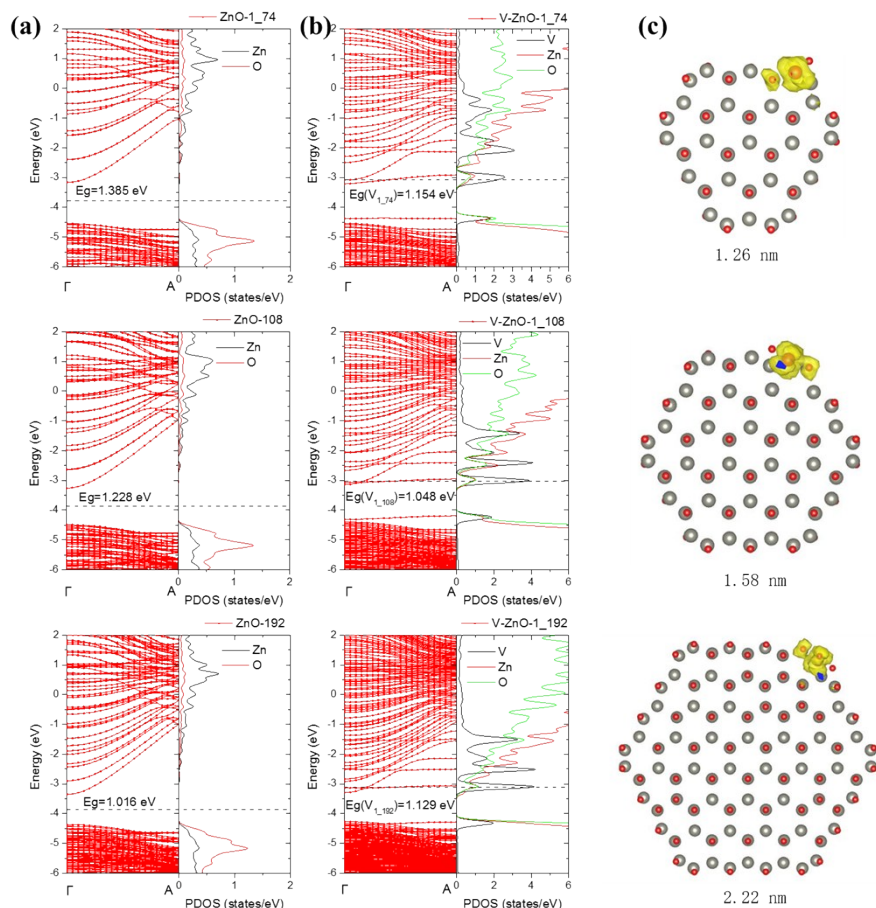

**Figure S3** (a) and (b) The size dependence of band structures and partial DOS of ZnO nanowires with/without V dopants. The dash line represents the Fermi energy level in the DFT calculations. (c) The structural models of V-doped ZnO nanowires and the local charge density at the Fermi level are shown in the right side of band structures.

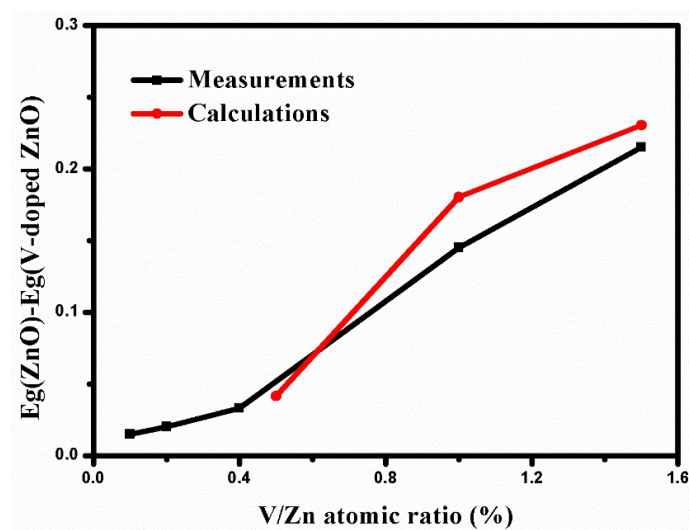

**Figure S4** The difference of the band gap of ZnO and V-doped ZnO as the increasing V/Zn atomic ratio by measurement results and theoretical calculation.

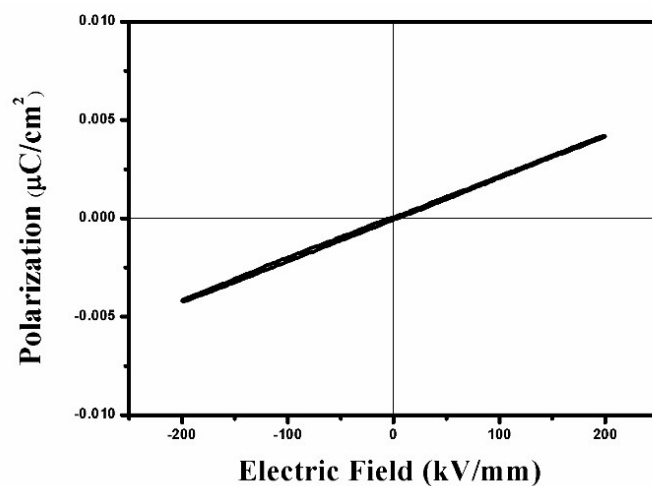

**Figure S5** The P-E curve of pure ZnO nanorods array.

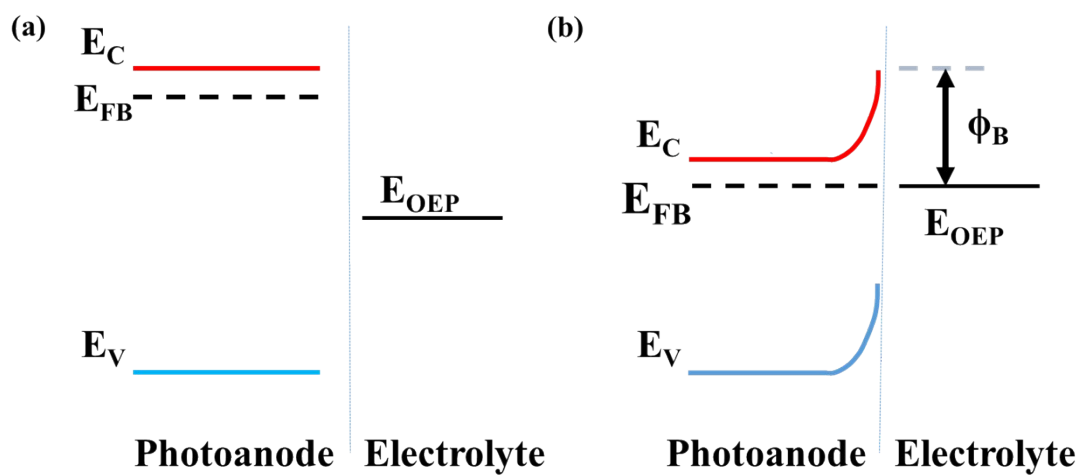

**Figure S6** Energy-band diagrams of the electrodes in (a) flat band condition and (b) equilibrium conditions.  $E_{FB}$  is the flat band potential,  $E_C$  and  $E_V$  are the conduction and valence band edges of ZnO, respectively, and  $E_{OEP}$  is the oxygen evolution potential.  $\Phi_B$  is the Schottky barrier height.
